# Supplementary material for: The venom-gland transcriptome of the eastern coral snake (Micrurus fulvius) reveals high venom complexity in the intragenomic evolution of venoms
Source: Springer Nature journal article supplement (doi:10.1186/1471-2164-14-531), 2013-08-02

# *Crotalus adamanteus*

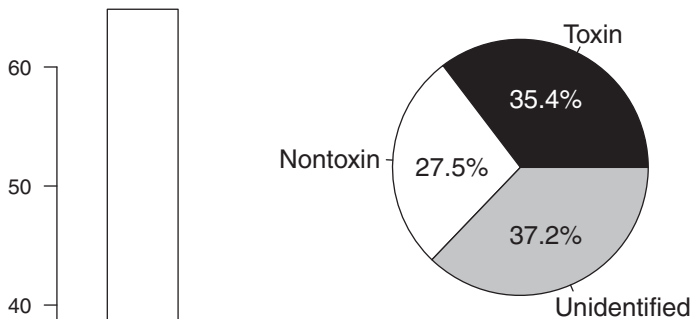

# *Micrurus fulvius*

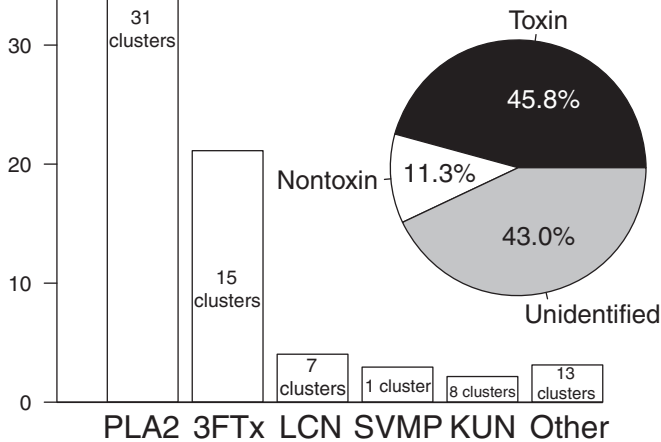

Supplement: 12864_2013_5233_MOESM2_ESM.pdf [file 12864_2013_5233_MOESM2_ESM.pdf]
